1 **Intraspecific variation in thermal tolerance differs between tropical and**  
2 **temperate fishes**

3 **Authors:** J.J.H. Nati<sup>1,2</sup>, M.B.S. Svendsen<sup>3</sup>, S. Marras<sup>4</sup>, S.S. Killen<sup>1</sup>, J.F. Steffensen<sup>2</sup>,  
4 D.J. McKenzie<sup>2</sup>, P. Domenici<sup>4</sup>

5 **Affiliations:**

6 <sup>1</sup>Institute of Biodiversity, Animal Health and Comparative Medicine, University of  
7 Glasgow, Graham Kerr Building, Glasgow G12 8QQ, UK.

8 <sup>2</sup>MARBEC, Université de Montpellier, CNRS, IFREMER, IRD, 34000 Montpellier,  
9 France.

10 <sup>3</sup>Marine Biological Section, Department of Biology, University of Copenhagen,  
11 Strandpromenaden 5, 3000 Helsingør, Denmark.

12 <sup>4</sup>CNR-IAS, Italian National Research Council, Institute of Anthropic impacts and  
13 Sustainability in the Marine Environment, Torregrande, 09170, Oristano, Italy

14

15 **Abstract:**

16 How ectothermic animals will cope with global warming, especially more frequent  
17 and intense heatwaves, is a critical determinant of the ecological impacts of climate  
18 change. There has been extensive study of upper thermal tolerance limits among  
19 fish species but how intraspecific variation in tolerance may be affected by habitat  
20 characteristics and evolutionary history has not been considered. Intraspecific  
21 variation is a primary determinant of species vulnerability to climate change, with  
22 implications for global patterns of impacts of ongoing warming. Using published  
23 critical thermal maximum (CT<sub>max</sub>) data on 203 marine and freshwater fish species,  
24 we found that intraspecific variation in upper thermal tolerance varies according to a  
25 species' latitude and evolutionary history. Notably, freshwater tropical species have  
26 lower variation in tolerance than temperate species in the northern hemisphere,  
27 which implies increased vulnerability to impacts of thermal stress. The extent of  
28 variation in CT<sub>max</sub> among fish species has a strong phylogenetic signal, which may  
29 indicate a constraint on evolvability to rising temperatures in tropical fishes. That is,  
30 in addition to living closer to their upper thermal limits, tropical species may have  
31 higher sensitivity and lower adaptability to global warming compared to temperate

32 counterparts. This is evidence that tropical fish communities, worldwide, are  
33 especially vulnerable to ongoing climate change.

34 The capacity of ectothermic species to cope with ongoing global warming, especially  
35 the increasing frequency, intensity and duration of extreme heatwaves, will be  
36 influenced by their upper thermal tolerance limits <sup>1-3</sup>. Tolerance of acute warming,  
37 measured as the critical thermal maximum (CT<sub>max</sub>), varies among fish species  
38 according to thermal conditions in their habitat <sup>4</sup>. Tropical species live in warm,  
39 relatively thermally stable habitats; they have narrow thermal tolerance ranges but  
40 higher CT<sub>max</sub> than species at temperate latitudes. Their warm habitat temperatures  
41 are also, however, closer to their limits of upper thermal tolerance, so they have a  
42 limited thermal safety margin (defined as the difference between upper thermal  
43 tolerance limit CT<sub>max</sub> of adult life stage and the maximum habitat temperature during  
44 summer <sup>5</sup>) and consequently are considered to be especially vulnerable to global  
45 warming <sup>6-9</sup>. Temperate species have lower absolute thresholds for tolerance of  
46 warming, but they have broader tolerance ranges, presumably because they  
47 encounter a wide range of habitat temperatures, both seasonally and spatially. This  
48 is linked to wider thermal safety margins than in tropical species<sup>4,10</sup>. These patterns  
49 of vulnerability to global warming, among species at a geographic scale, are major  
50 issues in projecting impacts of warming. They have a strong phylogenetic basis,  
51 which is believed to reflect local adaptation to common ancestral thermal regimes in  
52 related species <sup>11</sup>.

53 Studies of broadscale geographic patterns in vulnerability have, to date, focused  
54 upon average values for CT<sub>max</sub> among fish species. The significance of intraspecific  
55 variation in tolerance remains to be explored. The extent of variation in functional  
56 traits within species, particularly of physiological tolerances, is expected to have a  
57 profound influence on their vulnerability to global change <sup>12-15</sup>. Possessing a broad  
58 range of tolerance phenotypes in populations can reduce sensitivity to impacts of  
59 environmental stressors, through various proximate ecological mechanisms <sup>12-14</sup>. If  
60 phenotypic variation is linked to underlying genetic diversity in the species, this can  
61 provide scope for adaptability and evolvability, by yielding genotypes for selection in  
62 changing environments <sup>12-14</sup>. When fish species are challenged by thermal stressors  
63 such as increased seasonal temperatures and extreme heatwaves, the population

64 sensitivity and adaptability will be major determinants of their relative vulnerability <sup>13-</sup>  
65 <sup>16</sup> (Figure 1).

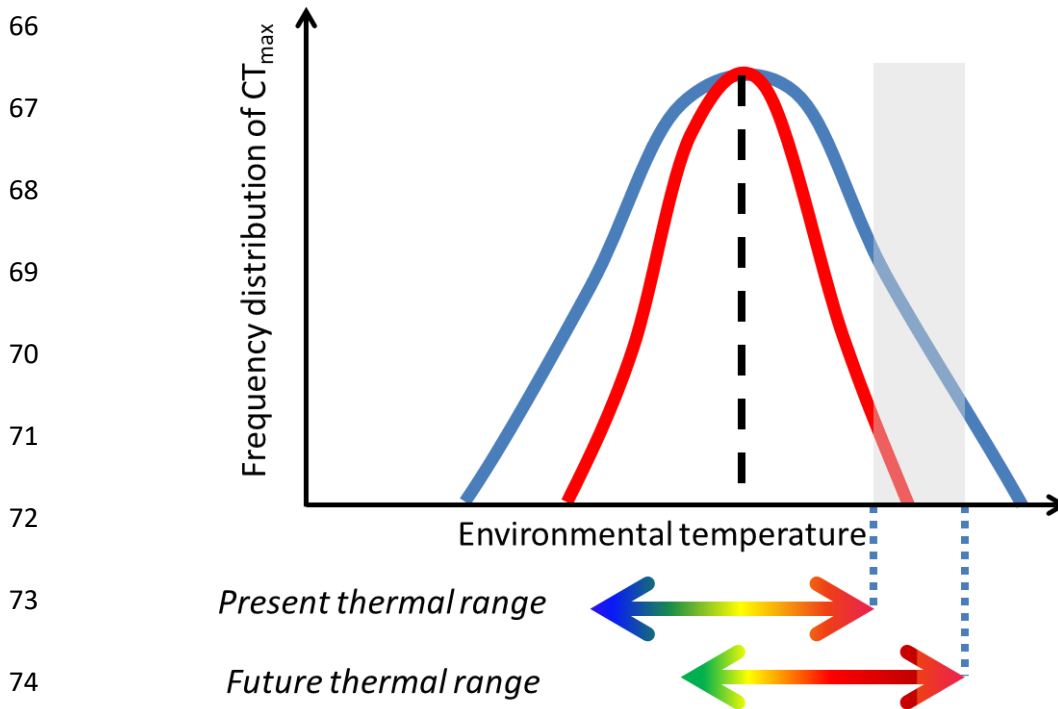

73

74

75 **Figure 1| Theoretical representation of different frequency distribution curves of  $CT_{max}$ .** The  
76 curves of two species have the same mean  $CT_{max}$  (dashed line) but different standard deviations  
77 (S.D.). With ongoing climate change, represented by the shift in the thermal range (double-pointed  
78 arrows), individuals of the species with the narrower S.D.  $CT_{max}$  (red curve) are less likely to survive  
79 compared to individuals of the species with the wider S.D.  $CT_{max}$  (blue curve), since maximum  
80 environmental temperatures will include values (grey area) outside their thermal tolerance range.

81 Fish species show intraspecific variation in  $CT_{max}$ , which has a component of both  
82 phenotypic plasticity and heritable genetic variation <sup>15, 17-19</sup>. The  $CT_{max}$  varies among  
83 populations of fish species, due to local adaptation <sup>20-22</sup>, indicating that the trait  
84 evolves in response to prevailing thermal regimes. Given the broader thermal range  
85 experienced by temperate fish species, within generations and over evolutionary  
86 time, we hypothesized that they would exhibit greater intraspecific variation in their  
87 thermal tolerance, measured as  $CT_{max}$ , than tropical species. We expected that the  
88 extent of variation might be linked to the magnitude of the thermal safety margin,  
89 because a small margin might constrain scope to express variation <sup>10</sup>. We also  
90 expected the extent of variation in  $CT_{max}$  to have a phylogenetic basis, indicating that  
91 it reflected evolutionary processes of adaptation.

92 We used published data <sup>4</sup> and, after a data selection process (see Methods), we  
93 estimated the extent of intraspecific variation in  $CT_{max}$  of 203 species of ray-finned

94 (actinopterygian) fish ( $n = 127$  freshwater,  $n = 76$  marine), based on the standard  
95 deviation of the mean. We were well aware that the selected studies in the dataset  
96 did not have the same protocol procedures. They did not use the same heating rate  
97 ( $0.0017\text{-}1^\circ\text{C}/\text{min}$ ) and fish size, both of which can influence the outcoming  $\text{CT}_{\text{max}}$  and  
98 standard deviation of the mean. We choose to not include these variables in our  
99 analysis because of the high variation of heating rate used and for fish size most  
100 studies did not report the size. We then compared two latitudinal groups, temperate  
101 to tropical species, considering the boundary to be  $23^\circ$  latitude. We also evaluated if  
102 variation in  $\text{CT}_{\text{max}}$  depended on whether species were from northern or southern  
103 hemisphere or whether species were marine or freshwater. Finally, we used the  
104 magnitude of the difference between acclimation temperature ( $T_a$ ) and  $\text{CT}_{\text{max}}$ , which  
105 we denoted delta temperature ( $\Delta T = \text{CT}_{\text{max}} - T_a$ ), as an indication of the capacity to  
106 increase  $\text{CT}_{\text{max}}$  depending on the acclimation temperature, and evaluated if it was  
107 linked to intraspecific variation in  $\text{CT}_{\text{max}}$ . All of the results were based on a  
108 phylogenetically informed analysis (phylogenetic least squares regression, PGLS,  
109 see Methods), to establish how patterns in the extent of variation were linked to  
110 evolutionary thermal history of the species.

111 There were significant differences in intraspecific variation in thermal tolerance in the  
112 two latitudinal groups (Figure 2). Freshwater tropical species showed lower  
113 intraspecific variation in  $\text{CT}_{\text{max}}$  ( $\log_{10}$  S.D.  $\text{CT}_{\text{max}}$ ) than temperate (tropical species:  
114 PGLS,  $t = -2.054$ ,  $p = 0.041$ , Figure 2). Species from northern hemisphere species  
115 had significantly lower variation in  $\log_{10}$  S.D.  $\text{CT}_{\text{max}}$  than southern ones (PGLS,  $t =$   
116  $2.318$ ,  $p = 0.022$ ; Figure 2A). Marine species did not differ from freshwater species  
117 (Figure 2B, PGLS,  $t = -1.683$ ,  $p = 0.094$ ). The  $\Delta T$  had no significant association with  
118  $\log_{10}$  S.D.  $\text{CT}_{\text{max}}$  (PGLS,  $t = 1.972$ ,  $p = 0.05$ ; Figure S1.). There was no interaction  
119 between latitude and  $\Delta T$  on  $\log_{10}$  S.D.  $\text{CT}_{\text{max}}$ . Phylogenetic relatedness among  
120 species contributed strongly to observed variation in  $\log_{10}$  S.D.  $\text{CT}_{\text{max}}$  (PGLS,  $\lambda =$   
121  $0.553$ ,  $F_{6,195} = 4.397$ ,  $p < 0.001$ ,  $R^2 = 11.92$ ; Figure S3).

122

123

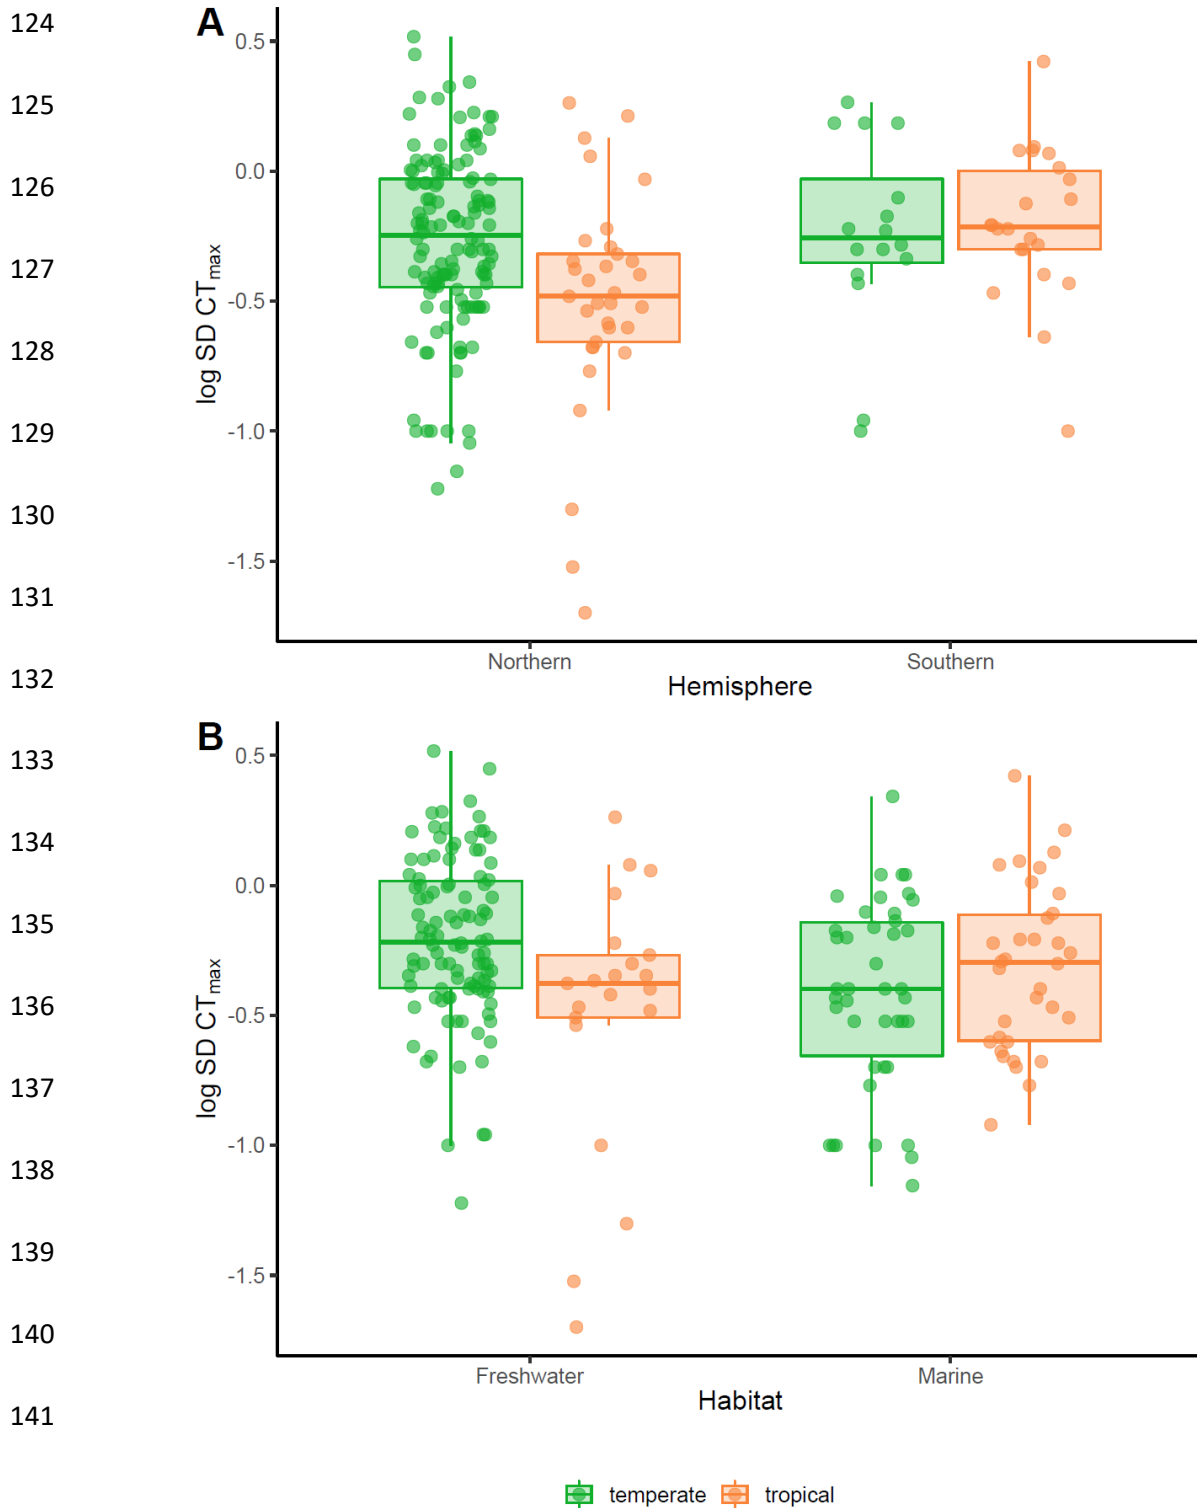

142 **Figure 2| Intraspecific variation in CT<sub>max</sub> (log<sub>10</sub> transformed standard deviation**  
143 **CT<sub>max</sub>) divided into either temperate (148 species) or tropical (55 species). (A)**  
144 **Separated by hemisphere, Northern (132 temperate, 33 tropical species) or**  
145 **Southern (16 temperate and 22 tropical species). (B) Separated into freshwater (106**  
146 **temperate, 21 tropical species) and marine (42 temperate, 34 tropical species).**

147 These results show that freshwater tropical species have reduced within-species  
148 variation in thermal tolerance compared to temperate species. If this reflects a  
149 reduced capacity for phenotypic plasticity, this will increase their sensitivity to  
150 warming in the short term. If it reflects diminished heritable genetic variation, this will  
151 decrease adaptability and evolvability to a warmer and more thermally stressful  
152 future, over generational timescales. That is, the lower intraspecific variation in  $CT_{max}$   
153 in freshwater tropical as compared to temperate species (Figure 2) renders the  
154 former especially vulnerable to future warming, in particular to extreme events <sup>24,25</sup>  
155 (Figure 1). This will compound the vulnerability of tropical species that derives from  
156 living near their upper thermal limits <sup>4,6,7,26</sup>.

157 The fact that variation in thermal tolerance was more pronounced and variable in the  
158 northern compared to southern hemisphere could be the result of two phenomena:  
159 1) greater thermal variability in the northern hemisphere <sup>4,6</sup>; or 2) a relative paucity of  
160 data for the southern hemisphere <sup>27</sup>. Nevertheless, the effect of hemisphere had a  
161 positive influence on intraspecific variation in  $CT_{max}$ . Therefore, local thermal  
162 conditions experienced by species are determinant in setting the natural individual  
163 variation within populations.

164 The strong phylogenetic signal for the extent of intraspecific variation in  $CT_{max}$  is  
165 presumably because many families contain species with a relatively common history  
166 of thermal adaptation (see Figure S3). That is, they have occupied similar thermal  
167 regimes within temperate or tropical habitats. In particular, there is a latitudinal effect  
168 on family distributions, with some families only being present in temperate (e.g.  
169 Gadidae) or tropical (e.g. Apogonidae) habitats, although some cosmopolitan  
170 families have species in both (e.g. Gobiidae, Blennidae) (Figure S2). In addition to  
171 the geographic collinearity that may be occurring with some families, the  
172 phylogenetically based differences in intraspecific variation among species may  
173 cause evolutionary constraints on evolvability in the face of ongoing warming and  
174 exposure to extreme events. The extent of such constraints is not clear and would  
175 depend on the exact genes affecting thermal tolerance and how these are  
176 represented within each family <sup>11</sup>. Further highlighting how temperature regime may  
177 shape evolutionary trajectories within closely related species or those with a  
178 common ancestor, with potential consequences for their vulnerability to thermal  
179 stress.

180 This evidence for higher vulnerability of tropical species to climate variability and  
181 extreme marine warming events<sup>28</sup> may have numerous ecological implications  
182 beyond simple tolerance thresholds. Tropical species may be obliged to seek  
183 thermal refugia in colder areas if these are available, potentially changing community  
184 structures<sup>9,29</sup>; such distribution shifts could have major ecological consequences  
185<sup>30,31</sup>. Overall, the extent of intraspecific variation in CT<sub>max</sub> must be considered in  
186 models that project impacts of warming on fishes. Intraspecific variation for  
187 tolerance in other environmental conditions such as hypoxia and acidification would  
188 be the next step for future research. Further research should focus on the  
189 mechanisms that underly latitudinal variation in CT<sub>max</sub> and whether these reflect  
190 universal principles across all species.

## 191 **Methods:**

192 **Dataset and data selection process.** We used the data on CT<sub>max</sub> in marine,  
193 brackish and freshwater fish species (2722 observations unimputed data set)  
194 published by<sup>4</sup>. We performed a three-step selection procedure to identify the  
195 species for this study. First, we excluded data where CT<sub>max</sub> was measured using  
196 death as an endpoint (1256 observations) as these do not correspond to the  
197 accepted definition of CT<sub>max</sub> (loss of equilibrium but not death)<sup>32</sup>, so the  
198 temperatures recorded will have exceeded the critical threshold. Second, we  
199 excluded polar species because of the sample size (n = 5) and discarded brackish  
200 water species because no indication was given about the nature of the brackish  
201 habitat (e.g. lagoon, estuary or others). Third, several species were tested at  
202 different acclimation temperatures resulting in multiple CT<sub>max</sub> measures for the same  
203 species. We therefore took CT<sub>max</sub> values measured at the lowest or mid-point tested  
204 acclimation temperature with the largest sample size of individuals used. This data  
205 selection procedure produced a dataset of 203 fish species for which we have S.D.  
206 of their CT<sub>max</sub> (standard deviation).

207 **Calculation of delta temperature.** We calculated the  $\Delta T$

$$208 \quad \Delta T = T_{CTmax} - T_a$$



209 The  $\Delta T$  defines the distance from thermal acclimation to thermal tolerance limit,  
210 providing an index of vulnerability to acute heating<sup>10</sup>. This accounts for the fact that  
211 acclimation temperature is often asymptotically linked to  $CT_{max}$ <sup>15,24</sup>.

212 **Data analysis.** Analyses and models were made in R (3.4.4, R Foundation for  
213 Statistical Computing) using the phylogenetic generalized least squared method<sup>33,34</sup>  
214 (PGLS, with caper package<sup>35</sup>. Model selection was completed by AIC values using  
215 the AIC function estimating the best model fit (see Suppl. Table 1). The phylogeny of  
216 203 fish species was found and generated from the comprehension tree of life  
217 (Suppl. Figure S3)<sup>36</sup> using the “rotl” package<sup>37</sup>. A measure of phylogenetic  
218 correlation,  $\lambda$ , the degree to which this trait evolution deviates from Brownian motion  
219<sup>38</sup>, was evaluated by fitting PGLS models with different values of  $\lambda$  to find that which  
220 maximized the log-likelihood of the best-fitted model. The level of statistical  
221 significance was set at alpha = 0.05.

222 **Phylogenetic analysis.** This was performed by PGLS on the 203 species’ specific  
223 geographical location, habitat,  $\Delta T$  and number of individuals measured. As fishes’  
224 physiology is dependent on the environmental thermal conditions, hemisphere was  
225 incorporated into the model because of the significant differences in thermal  
226 variability between the two hemispheres<sup>6</sup>, with the north having higher thermal  
227 variation than the south<sup>27</sup>. Due to the effects of local thermal variation on fish  
228 thermal physiology, we included an interaction term between latitudinal groups  
229 (tropical versus temperate) and the  $\Delta T$ . We also conducted general linear model  
230 (GLM) analysis to exclude the effect of phylogeny on the outcome of the observed  
231 variation in  $\log_{10} S.D.CT_{max}$ , testing the individual effects of our variables in the  
232 model (suppl. Table 3).

## 233 **References**

- 234 1. Frölicher, T. L., Fischer, E. M. & Gruber, N. Marine heatwaves under global  
235 warming. *Nature* **560**, 360–364 (2018).
- 236 2. Stillman, J. H. Heat waves, the new normal: Summertime temperature  
237 extremes will impact animals, ecosystems, and human communities.  
238 *Physiology* **34**, 86–100 (2019).
- 239 3. Williams, C. M. *et al.* Biological impacts of thermal extremes: mechanisms and  
240 costs of functional responses matter. *Integr. Comp. Biol.* **56**, 73–84 (2016).



- 241 4. Comte, L. & Olden, J. D. Climatic vulnerability of the world's freshwater and  
242 marine fishes. *Nat. Clim. Chang.* **7**, 718–722 (2017).
- 243 5. Dahlke, F. T., Wohlrab, S., Butzin, M. & Pörtner, H. O. Thermal bottlenecks in the life  
244 cycle define climate vulnerability of fish. *Science*. **369**, 65–70 (2020).
- 245 6. Sunday, J. M., Bates, A. E. & Dulvy, N. K. Global analysis of thermal tolerance  
246 and latitude in ectotherms. *Proc. R. Soc. B Biol. Sci.* **278**, 1823–1830 (2011).
- 247 7. Rummer, J. L. *et al.* Life on the edge: Thermal optima for aerobic scope of  
248 equatorial reef fishes are close to current day temperatures. *Glob. Chang. Biol.*  
249 **20**, 1055–1066 (2014).
- 250 8. Stuart-Smith, R. D., Edgar, G. J., Barrett, N. S., Kininmonth, S. J. & Bates, A.  
251 E. Thermal biases and vulnerability to warming in the world's marine fauna.  
252 *Nature* **528**, 88–92 (2015).
- 253 9. Pinsky, M. L., Eikeset, A. M., McCauley, D. J., Payne, J. L. & Sunday, J. M.  
254 Greater vulnerability to warming of marine versus terrestrial ectotherms.  
255 *Nature* **569**, 108–111 (2019).
- 256 10. Bennett, S., Duarte, C. M., Marbà, N. & Wernberg, T. Integrating within-  
257 species variation in thermal physiology into climate change ecology. *Philos.*  
258 *Trans. R. Soc. B Biol. Sci.* **374**, 20180550 (2019).
- 259 11. Comte, L. & Olden, J. D. Evolutionary and environmental determinants of  
260 freshwater fish thermal tolerance and plasticity. *Glob. Chang. Biol.* **23**, 728–  
261 736 (2017).
- 262 12. Bolnick, D. I. *et al.* Why intraspecific trait variation matters in community  
263 ecology. *Trends Ecol. Evol.* **26**, 183–192 (2011).
- 264 13. Pacifici, M. *et al.* Assessing species vulnerability to climate change. *Nat. Clim.*  
265 *Chang.* **5**, 215–225 (2015).
- 266 14. Moran, E. V., Hartig, F. & Bell, D. M. Intraspecific trait variation across scales:  
267 Implications for understanding global change responses. *Global Change*  
268 *Biology* **22**, 137–150 (2016).
- 269 15. McKenzie, D. J. *et al.* Intraspecific variation in tolerance of warming in fishes.  
270 *J. Fish Biol.* **In review**, (2020).
- 271 16. Mimura, M. *et al.* Understanding and monitoring the consequences of human  
272 impacts on intraspecific variation. *Evol. Appl.* **10**, 121–139 (2017).
- 273 17. Doyle, C. M., Leberg, P. L. & Klerks, P. L. Heritability of heat tolerance in a  
274 small livebearing fish, *Heterandria formosa*. *Ecotoxicology* **20**, 535–542

- 275 (2011).
- 276 18. Meffe, G. K., Weeks, S. C., Mulvey, M. & Kandl, K. L. Genetic differences in  
277 thermal tolerance of eastern mosquitofish (*Gambusia holbrooki*; Poeciliidae)  
278 from ambient and thermal ponds. *Can. J. Fish. Aquat. Sci.* **52**, 2704–2711  
279 (1995).
- 280 19. Gradil, K. J., Garner, S. R., Wilson, C. C., Farrell, A. P. & Neff, B. D.  
281 Relationship between cardiac performance and environment across  
282 populations of Atlantic salmon (*Salmo salar*): a common garden experiment  
283 implicates local adaptation. *Evol. Ecol.* **30**, 877–886 (2016).
- 284 20. Fanguie, N. a, Hofmeister, M. & Schulte, P. M. Intraspecific variation in thermal  
285 tolerance and heat shock protein gene expression in common killifish,  
286 *Fundulus heteroclitus*. *J. Exp. Biol.* **209**, 2859–72 (2006).
- 287 21. Chen, Z., Farrell, A. P., Matala, A. & Narum, S. R. Mechanisms of thermal  
288 adaptation and evolutionary potential of conspecific populations to changing  
289 environments. *Mol. Ecol.* **27**, 659–674 (2018).
- 290 22. Chen, Z., Farrell, A. P., Matala, A., Hoffman, N. & Narum, S. R. Physiological  
291 and genomic signatures of evolutionary thermal adaptation in redband trout  
292 from extreme climates. *Evol. Appl.* **11**, 1686–1699 (2018).
- 293 23. Currie, S. & Schulte, P. M. Thermal Stress. in *The Physiology of Fishes 4th*  
294 *edn.* (eds. Evans, D. H., Claiborne, J. & Currie, S.) 257–279 (CRC Press,  
295 2014).
- 296 24. Oliver, T. H. *et al.* Biodiversity and Resilience of Ecosystem Functions. *Trends*  
297 *Ecol. Evol.* **30**, 673–684 (2015).
- 298 25. Mori, A. S., Furukawa, T. & Sasaki, T. Response diversity determines the  
299 resilience of ecosystems to environmental change. *Biol. Rev.* **88**, 349–364  
300 (2013).
- 301 26. Rodgers, G. G., Donelson, J. M., McCormick, M. I. & Munday, P. L. In hot  
302 water: sustained ocean warming reduces survival of a low-latitude coral reef  
303 fish. *Mar. Biol.* **165**, 1–10 (2018).
- 304 27. Seebacher, F., White, C. R. & Franklin, C. E. Physiological plasticity increases  
305 resilience of ectothermic animals to climate change. *Nat. Clim. Chang.* **5**, 61–  
306 66 (2015).
- 307 28. Frölicher, T. L. (2019). Extreme climatic events in the ocean. In: Cisneros-  
308 Montemayor A. M., Cheung W. W. L. and Ota Y. (Eds.), Predicting Future

- 309 Oceans: Sustainability of Ocean and Human Systems Amidst Global  
310 Environmental Change, pp 53–60.
- 311 29. Wernberg, T *et al.* An extreme climatic event alters marine ecosystem  
312 structure in a global biodiversity hotspot. *Nature Climate Change*, **3**(1), 78–82  
313 (2013).
- 314 30. Burrows, M. T. *et al.* Geographical limits to species-range shifts are suggested  
315 by climate velocity. *Nature*, **507**(7493), 492–495 (2014).
- 316 31. Molinos, J. G. *et al.* Climate velocity and the future global redistribution of  
317 marine biodiversity. *Nature Climate Change*, **6**(1), 83–88 (2016).
- 318 32. Cox, D.K., 1974. Effects of three heating rates on the critical thermal maximum  
319 of bluegill. in *Thermal Ecology*. (eds. Gibbons, J. W. & Sharitz, R. R.) (National  
320 Technical Information Service 1974).
- 321 33. Grafen A. The phylogenetic regression. *Philos. Trans. R. Soc. London* **326**,  
322 119–157 (1989).
- 323 34. Garland, Jr., T. & Ives, A. R. Using the Past to Predict the Present: Confidence  
324 Intervals for Regression Equations in Phylogenetic Comparative Methods. *Am.*  
325 *Nat.* **155**, 346–364 (2000).
- 326 35. Orme, D. The caper package: comparative analysis of phylogenetics and  
327 evolution in R (2013); <http://cran.r-project.org/web/packages/caper/index.html>
- 328 36. Hinchliff, C. E. *et al.* Synthesis of phylogeny and taxonomy into a  
329 comprehensive tree of life. *Proc. Natl. Acad. Sci.* 201423041 (2015).
- 330 37. Michonneau, F., Brown, J. W. & Winter, D. J. rotl: an R package to interact  
331 with the Open Tree of Life data. *Methods Ecol. Evol.* **7**, 1476–1481 (2016);  
332 <http://cran.r-project.org/web/packages/rotl/index.html>
- 333 38. Freckleton, R. P. The seven deadly sins of comparative analysis. *J. Evol. Biol.*  
334 **22**, 1367–75 (2009).

335

### 336 **Authors contributions**

337 J.J.H. Nati, M.B.S. Svendsen, S. Marras, S.S. Killen, J.F. Steffensen, D.J. McKenzie,  
338 P. Domenici designed the study. J.J.H. Nati and S.S. Killen performed the statistical  
339 analyses. J.J.H. Nati wrote the manuscript. J.J.H. Nati, M.B.S. Svendsen, S. Marras,  
340 S.S. Killen, J.F. Steffensen, D.J. McKenzie, P. Domenici revised the manuscript.

### 341 **Competing financial interests**

342 The authors declare to have no financial interests
